# Supplementary material
Source: PubMed Central journal article supplement (PMC4793685)
Supplement: jort016429.ww2_default.pdf [file jort016429.ww2_default.pdf]

Appendix 2. Comorbidity in the Inter99 study. Potentially live shortening diagnoses, which are adjusted for in Cox regression analyses.

Diagnose/(s) in one organ system = 1 point (except \*)

|    | Diseases– organ systems                                                                                                 | Variabel                                                              | ICD 8 and 10 codes                                                                                                                                                              |
|----|-------------------------------------------------------------------------------------------------------------------------|-----------------------------------------------------------------------|---------------------------------------------------------------------------------------------------------------------------------------------------------------------------------|
| 1  | Infections                                                                                                              | DG1                                                                   | 079.83, B20-24                                                                                                                                                                  |
| 2  | Cancer<br><br>(* different DG2 to DG8 diagnoses count with 1 point each)                                                | DG2<br><br>DG3<br><br>DG4<br><br>DG5<br><br>DG6<br><br>DG7<br><br>DG8 | 140-149, C00-14<br><br>150-159, C15-26<br><br>160-163, C30-39<br><br>170-174, C40-43, C45-50<br><br>180-189, C51-C68<br><br>190-199, C69-80, C97, D37-48<br><br>200-209, C81-96 |
| 3  | Blood and blood forming organs                                                                                          | DG9                                                                   | 282, 284, 286, D55, D58, D61, D66-68, D81-82                                                                                                                                    |
| 4  | Diabetes<br><br>Obesity<br><br>(* different DG10 to DG11 diagnoses count with 1 point each)                             | DG10<br><br>DG11                                                      | 250, E10-14<br><br>277, E66.2, E66.8                                                                                                                                            |
| 5  | Mental disorders                                                                                                        | DG12                                                                  | 290, 303-304, 295-296, 306.50, F00-03, F10-19 (.2 .6 .7), F20, F30-34, F39, F50                                                                                                 |
| 6  | Nervous system                                                                                                          | DG13                                                                  | 331.09, 332, 340-342, 330, 344, 348, G10-13, G20-21, G30-32, G35, G37, G70-71, G80-83                                                                                           |
| 7  | Cardiovascular system                                                                                                   | DG14                                                                  | 394-398, 400, 402-404, 410-413, 423-426, 427.09, 427.19, 427.27, 427.97, 428, 450, 452, I05-09, I11.0, I12.0, I13.0-13.2, I20-28, I31.0-31.1, I34-37, I46.0, I49.0, I50         |
| 8  | Cerebrovascular system<br><br>Arteries<br><br>Veins<br><br>(* different DG15 to DG17 diagnoses count with 1 point each) | DG15<br><br>DG16<br><br>DG17                                          | 431-434, I61-64, I67.4, I69<br><br>441-442, 444, I71-72, I74<br><br>456.09, 456.00, 456.01, I85                                                                                 |
| 9  | Respiratory system                                                                                                      | DG18                                                                  | 490-493, 515-518, J40-47, J60-66, J68.4, J70.3, J96.1                                                                                                                           |
| 10 | Liver and pancreas                                                                                                      | DG19                                                                  | 570, 573.00, 573.01, 577.19, 577.91, 577.92, K70-74, K76.0-76.3, K76.6, K86.0-86.3                                                                                              |
| 11 | Skin                                                                                                                    | DG20                                                                  | 716.09, 446, 695.49, M30-36                                                                                                                                                     |
| 12 | Renal and urinary system                                                                                                | DG21                                                                  | 581, 582, 593.20, N01, N03, N04, N11, N18-19                                                                                                                                    |
| 13 | Chromosomes                                                                                                             | DG22                                                                  | 310.15-310.59, Q90, Q96, Q98                                                                                                                                                    |
