# Supplementary material
Source: PubMed Central journal article supplement (PMC4793685)
Supplement: jort016429.ww3_default.pdf [file jort016429.ww3_default.pdf]

Appendix 3. Hazard ratio of incident cases of IHD in the whole population of the Inter99 study 10 years after study start. Results are shown separately for men and women.

| Outcome                   | Number of participants | Number of person years | Number of events (intervention/control group) | Hazard Ratio (95 % C.I.)<br>Control group is ref=1 | Interactions group* age (p-value) |
|---------------------------|------------------------|------------------------|-----------------------------------------------|----------------------------------------------------|-----------------------------------|
| <b>IHD - Men</b>          |                        |                        |                                               |                                                    |                                   |
| Model 1                   | 28,437                 | 265,532                | 352/1,367                                     | 1.01 (0.90 to 1.14)                                | 0.17                              |
| Model 2                   | 27,745                 | 259,359                | 340/1,330                                     | 1.01 (0.90 to 1.14)                                |                                   |
| Model 3                   | 27,745                 | 259,359                | 340/1,330                                     | 1.01 (0.90 to 1.14)                                |                                   |
| <b>Stroke - Men</b>       |                        |                        |                                               |                                                    |                                   |
| Model 1                   | 29,010                 | 273,896                | 191/802                                       | 0.99 (0.84 to 1.16)                                | 0.94                              |
| Model 2                   | 28,302                 | 267,393                | 188/791                                       | 0.99 (0.85 to 1.17)                                |                                   |
| Model 3                   | 28,302                 | 267,393                | 188/791                                       | 0.99 (0.84 to 1.16)                                |                                   |
| <b>IHD + Stroke - Men</b> |                        |                        |                                               |                                                    |                                   |
| Model 1                   | 28,137                 | 260,094                | 478/1,929                                     | 0.98 (0.88 to 1.08)                                | 0.22                              |
| Model 2                   | 27,453                 | 254,010                | 463/1,886                                     | 0.97 (0.88 to 1.08)                                |                                   |
| Model 3                   | 27,453                 | 254,010                | 463/1,886                                     | 0.97 (0.87 to 1.07)                                |                                   |
| <b>Total death - Men</b>  |                        |                        |                                               |                                                    |                                   |
| Model 1                   | 29,370                 | 280,746                | 354/1,558                                     | 0.96 (0.85 to 1.08)                                | 0.94                              |
| Model 2                   | 28,654                 | 274,126                | 345/1,528                                     | 0.96 (0.85 to 1.08)                                |                                   |
| Model 3                   | 28,654                 | 274,126                | 345/1,528                                     | 0.95 (0.84 to 1.07)                                |                                   |

Model 1: adjusted for age

Model 2: adjusted for age, education, ethnicity, and cohabitation

Model 3: adjusted for age, education, ethnicity, cohabitation, and co-morbidity

| Outcome                     | Number of participants | Number of person years | Number of events (intervention/control group) | Hazard Ratio (95 % C.I.)<br>Control group is ref=1 | Interactions group* age (p-value) |
|-----------------------------|------------------------|------------------------|-----------------------------------------------|----------------------------------------------------|-----------------------------------|
| <b>IHD - Women</b>          |                        |                        |                                               |                                                    |                                   |
| Model 1                     | 29,871                 | 286,095                | 213/850                                       | 1.07 (0.91 to 1.24)                                | 0.64                              |
| Model 2                     | 29,056                 | 278,449                | 205/809                                       | 1.08 (0.93 to 1.27)                                |                                   |
| Model 3                     | 29,056                 | 278,449                | 205/809                                       | 1.09 (0.93 to 1.27)                                |                                   |
| <b>Stroke - Women</b>       |                        |                        |                                               |                                                    |                                   |
| Model 1                     | 29,930                 | 288,359                | 135/598                                       | 0.97 (0.80 to 1.17)                                | 0.17                              |
| Model 2                     | 29,110                 | 280,547                | 133/573                                       | 0.99 (0.82 to 1.20)                                |                                   |
| Model 3                     | 29,110                 | 280,547                | 133/573                                       | 0.98 (0.81 to 1.19)                                |                                   |
| <b>IHD + Stroke - Women</b> |                        |                        |                                               |                                                    |                                   |
| Model 1                     | 29,578                 | 281,251                | 328/1,314                                     | 1.06 (0.93 to 1.19)                                | 0.71                              |
| Model 2                     | 28,773                 | 273,744                | 319/1,257                                     | 1.08 (0.95 to 1.22)                                |                                   |
| Model 3                     | 28,773                 | 273,744                | 319/1,257                                     | 1.08 (0.95 to 1.22)                                |                                   |
| <b>Total death - Women</b>  |                        |                        |                                               |                                                    |                                   |
| Model 1                     | 30,246                 | 293,892                | 241/1,010                                     | 1.06 (0.92 to 1.22)                                | 0.29                              |
| Model 2                     | 29,416                 | 285,906                | 238/989                                       | 1.06 (0.92 to 1.23)                                |                                   |
| Model 3                     | 29,416                 | 285,906                | 238/989                                       | 1.04 (0.90 to 1.20)                                |                                   |

Model 1: adjusted for age

Model 2: adjusted for age, education, ethnicity, and cohabitation

Model 3: adjusted for age, education, ethnicity, cohabitation, and co-morbidity
